# Supplementary material for: Psychological advocacy towards healing (PATH): A randomized controlled trial of a psychological intervention in a domestic violence service setting
Source: PLOS journal article supplement (doi:10.1371/journal.pone.0205485), 2018-11-27
Supplement: S5 (10.1371/journal.pone.0205485.s005) [file journal.pone.0205485.s005.docx]

**S4 Fig. Main outcomes, time trends**

**Panel A. Average CORE-OM score over time, by treatment arm**

**Panel B. Average PHQ9 score over time, by treatment arm**

Average CORE-OM( panel A) and PHQ9 (panel B) scores, by treatment arm, at each time point. Means are weighted by sampling design (city (Bristol/Cardiff) and setting (in the community/refuge))
